# Supplementary material for: Synthesis of colloidal MnO2with a sheet-like structure by one-pot plasma discharge in permanganate aqueous solution
Source: Royal Society of Chemistry journal article supplement (doi:10.1039/c5ra20416j), 2015-12-23
Supplement: c5ra20416j1.pdf [file c5ra20416j1.pdf]

## Supplementary Information

### Synthesis of colloidal MnO<sub>2</sub> with sheet-like structure by one-pot plasma discharge in permanganate aqueous solution

Hyemin Kim <sup>a</sup>, Anyarat Watthanaphanit <sup>a,b</sup>, and Nagahiro Saito <sup>a,b,c,\*</sup>

<sup>a</sup> Graduate School of Engineering, Nagoya University, Furo-cho, Chikusa-ku, Nagoya 464-8603, Japan

<sup>b</sup> Social Innovation Design Center, Institute of Innovation for Future Society, Nagoya University, Furo-cho, Chikusa-ku, Nagoya 464-8603, Japan

<sup>c</sup> Green Mobility Collaborative Research Center, Nagoya University, Furo-cho, Chikusa-ku, Nagoya 464-8603, Japan

\*Corresponding author should be addressed to E-mail: hiro@rd.numse.nagoya-u.ac.jp

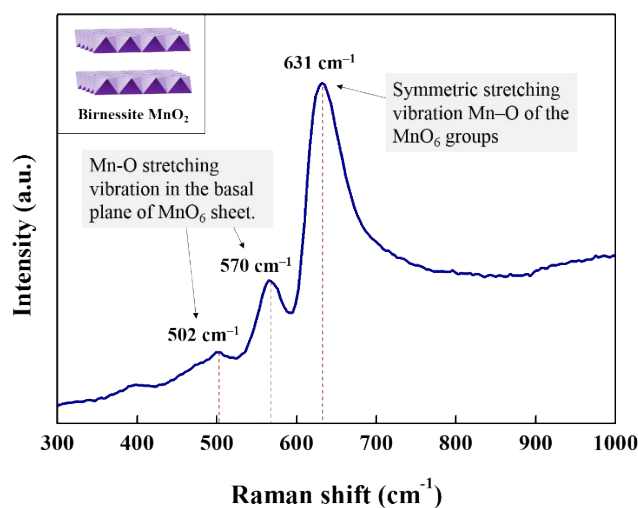

**Fig. S1** Raman spectrum of the MnO<sub>2</sub> powder separated from the colloidal MnO<sub>2</sub> by centrifugation.

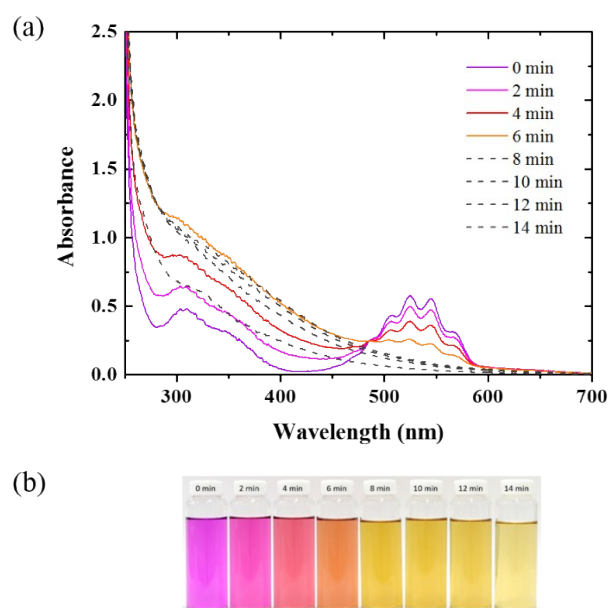

**Fig. S2** (a) UV-vis absorption spectra of the SPP treated  $\text{KMnO}_4$  aqueous solutions ( $\text{pH} = 2$ ) with discharge times of 0–14 min, along with (b) photograph of the obtained solutions as a function of discharge time.

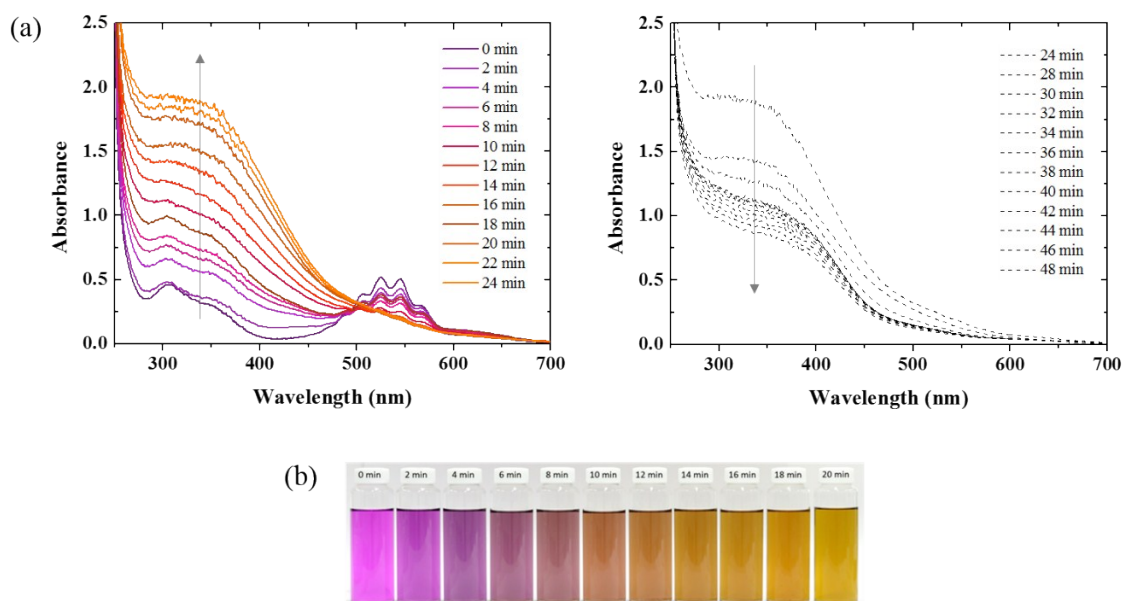

**Fig. S3** (a) UV-vis absorption spectra of the SPP treated  $\text{KMnO}_4$  aqueous solutions ( $\text{pH} = 12$ ) with discharge times of 0–14 min, along with (b) photograph of the obtained solutions as a function of discharge time.

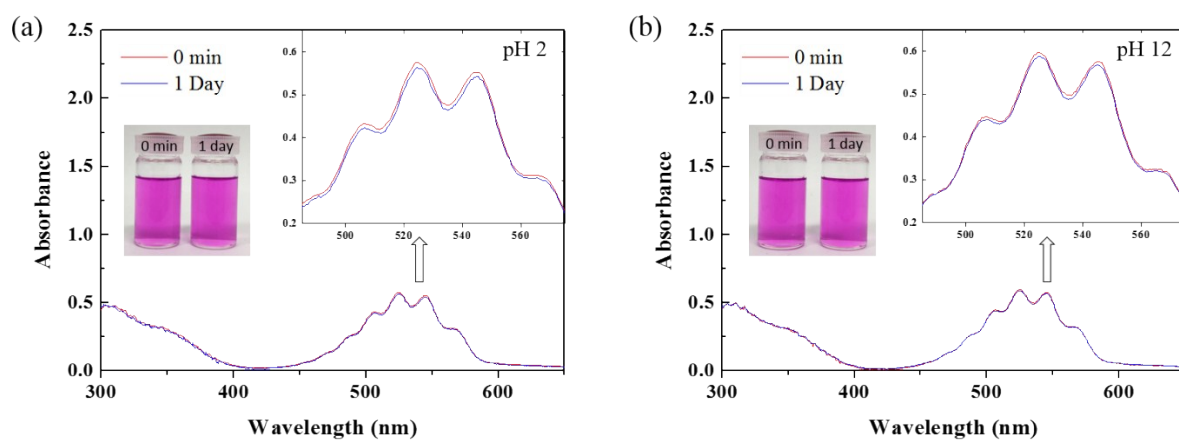

**Fig. S4** UV-vis spectra and photographs of the untreated  $\text{KMnO}_4$  aqueous solutions of (a) pH = 2, and (b) pH = 12, immediately after sample preparation (0 min) and after the solutions were left for 1 day.

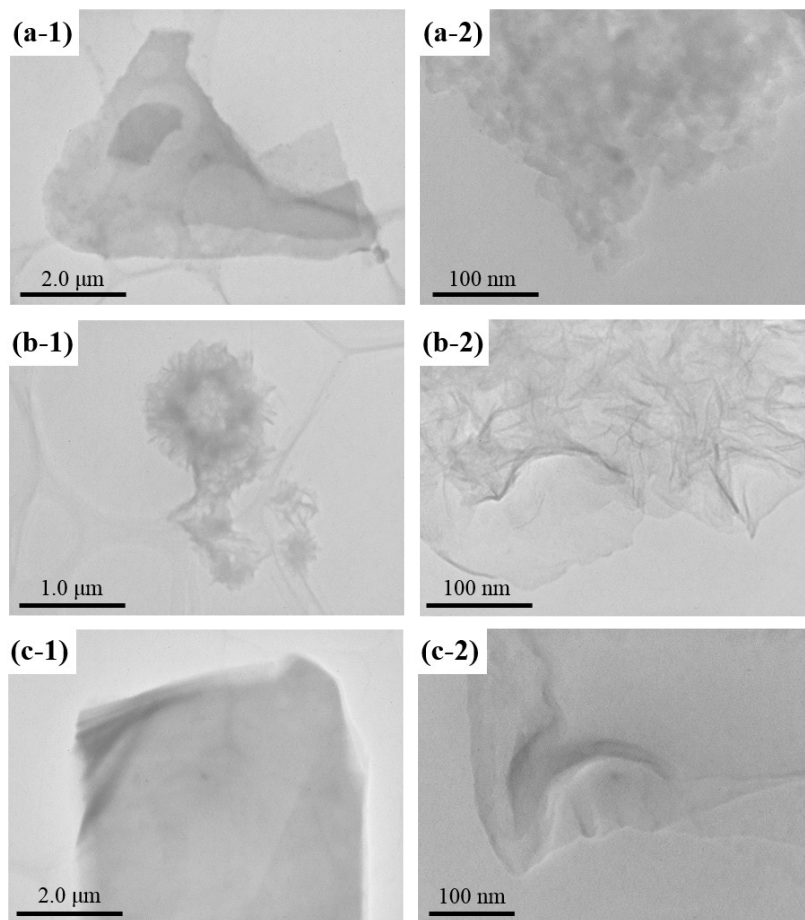

**Fig. S5** TEM images of the colloidal  $\text{MnO}_2$  synthesized at different pH conditions: (a) 2, (b) 7 and (c) 12, at low and high magnifications.

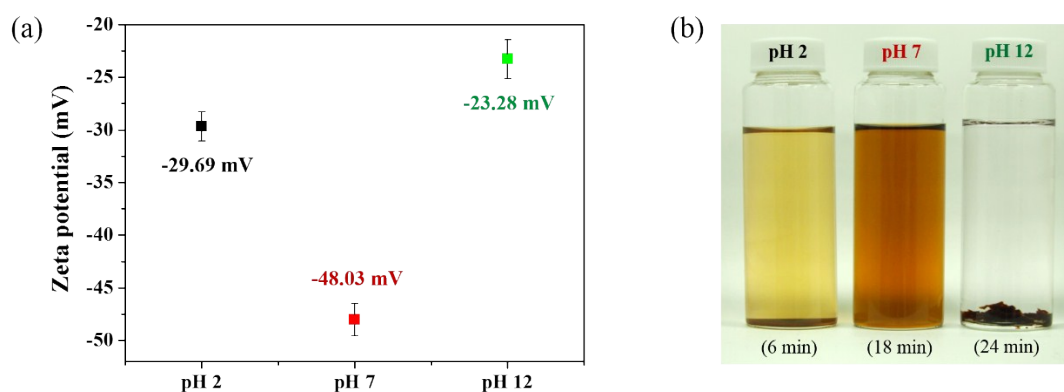

**Fig. S6** (a) Zeta potential (after 24 hours) and (b) photographs (after 3 months) of the colloidal  $\text{MnO}_2$  synthesized at different pH conditions: 2, 7 and 12.
